# Supplementary material for: Climate warming is expanding dengue burden in the Americas and Asia
Source: PubMed Central journal article supplement — medRxiv. 2025 Feb 7:2024.01.08.24301015. Originally published 2024 Jan 9. Preprint. [Version 2] doi: 10.1101/2024.01.08.24301015 (PMC10802639; doi:10.1101/2024.01.08.24301015), 2025-02-07
Supplement: NIHPP2024.01.08.24301015v1-supplement-1.pdf [file NIHPP2024.01.08.24301015v1-supplement-1.pdf]

## Supplemental Information

January 8, 2024

Table S1: Raw dengue data sources and information. MoH = Ministry of Health

| Country | Spatial resolution | Number of administrative units | Original temporal resolution | Start date | End date | Data source           |
|---------|--------------------|--------------------------------|------------------------------|------------|----------|-----------------------|
| BOL     | Admin 1            | 9                              | weekly                       | 12/1/13    | 12/31/19 | PAHO                  |
| BRA     | Admin 2            | 5570                           | weekly                       | 1/1/01     | 12/31/19 | MoH DATASUS           |
| COL     | Admin 2            | 1122                           | weekly                       | 1/1/07     | 12/31/19 | MoH SIVIGILA          |
| CRI     | Admin 1            | 6                              | weekly                       | 1/1/12     | 12/31/19 | MoH                   |
| DOM     | Admin 2            | 32                             | weekly                       | 1/1/07     | 12/31/18 | MoH DIEPI             |
| HND     | Admin 1            | 18                             | weekly                       | 1/1/17     | 6/30/19  | PAHO                  |
| IDN     | Admin 1            | 34                             | monthly                      | 1/1/00     | 12/31/17 | Tycho                 |
| KHM     | Admin 1            | 25                             | monthly                      | 1/1/98     | 12/31/10 | Tycho                 |
| LAO     | Admin 1            | 18                             | monthly                      | 1/1/98     | 12/31/10 | Tycho                 |
| LKA     | Admin 2            | 25                             | monthly                      | 1/1/10     | 12/31/19 | MoH Epidemiology Unit |
| LKA1    | Admin 1            | 9                              | monthly                      | 1/1/96     | 12/31/04 | Tycho                 |
| MEX     | Admin 1            | 32                             | weekly                       | 1/1/03     | 12/31/19 | MoH                   |
| MYS     | Admin 1            | 16                             | monthly                      | 1/1/93     | 12/31/10 | Tycho                 |
| NIC     | Admin 1            | 17                             | monthly                      | 1/1/00     | 12/31/04 | Tycho                 |
| NIC     | Admin 1            | 17                             | weekly                       | 1/1/04     | 12/31/19 | PAHO                  |
| PAN     | Admin 1            | 13                             | weekly                       | 1/1/18     | 12/31/19 | PAHO                  |
| PER     | Admin 2            | 196                            | weekly                       | 1/1/10     | 12/31/19 | CDC Peru              |
| PHL     | Admin 2            | 87                             | monthly                      | 1/1/94     | 12/31/10 | Tycho                 |
| SLV     | Admin 1            | 14                             | monthly                      | 1/1/00     | 8/31/09  | Tycho                 |
| THA     | Admin 1            | 77                             | monthly                      | 1/1/93     | 12/31/10 | Tycho                 |
| THA     | Admin 1            | 77                             | monthly                      | 1/1/11     | 12/31/19 | MoPH                  |
| TWN     | Admin 2            | 22                             | weekly                       | 1/1/05     | 12/31/19 | Taiwan NIDSS          |
| VEN     | Admin 1            | 25                             | monthly                      | 1/1/99     | 3/31/05  | Tycho                 |
| VEN     | Admin 1            | 25                             | weekly                       | 1/1/17     | 12/31/19 | PAHO                  |
| VNM     | Admin 1            | 63                             | monthly                      | 1/1/94     | 12/31/10 | Tycho                 |

Table S2: GCM scenarios and variants included in projections.

|    | GCM           | historical-natural | future   |
|----|---------------|--------------------|----------|
| 1  | ACCESS-CM2    | r1i1p1f1           | r1i1p1f1 |
| 2  | ACCESS-ESM1-5 | r1i1p1f1           | r3i1p1f1 |
| 3  | AWI-CM-1-1-MR |                    | r1i1p1f1 |
| 4  | BCC-CSM2-MR   | r1i1p1f1           | r1i1p1f1 |
| 5  | CAMS-CSM1-0   |                    | r1i1p1f1 |
| 6  | CESM2         | r1i1p1f1           | r4i1p1f1 |
| 7  | CESM2-WACCM   |                    | r1i1p1f1 |
| 8  | CNRM-CM6-1    | r1i1p1f2           | r1i1p1f2 |
| 9  | CNRM-ESM2-1   |                    | r1i1p1f2 |
| 10 | FGOALS-f3-L   |                    | r1i1p1f1 |
| 11 | GFDL-ESM4     | r1i1p1f1           | r1i1p1f1 |
| 12 | GISS-E2-1-G   | r1i1p1f2           | r1i1p3f1 |
| 13 | GISS-E2-1-H   |                    | r1i1p1f2 |
| 14 | IITM-ESM      |                    | r1i1p1f1 |
| 15 | KACE-1-0-G    |                    | r1i1p1f1 |
| 16 | MCM-UA-1-0    |                    | r1i1p1f2 |
| 17 | MIROC-ES2L    |                    | r1i1p1f2 |
| 18 | MIROC6        | r1i1p1f1           | r1i1p1f1 |
| 19 | MPI-ESM1-2-HR |                    | r1i1p1f1 |
| 20 | MPI-ESM1-2-LR |                    | r1i1p1f1 |
| 21 | MRI-ESM2-0    | r1i1p1f1           | r1i1p1f1 |
| 22 | NorESM2-LM    | r1i1p1f1           | r1i1p1f1 |

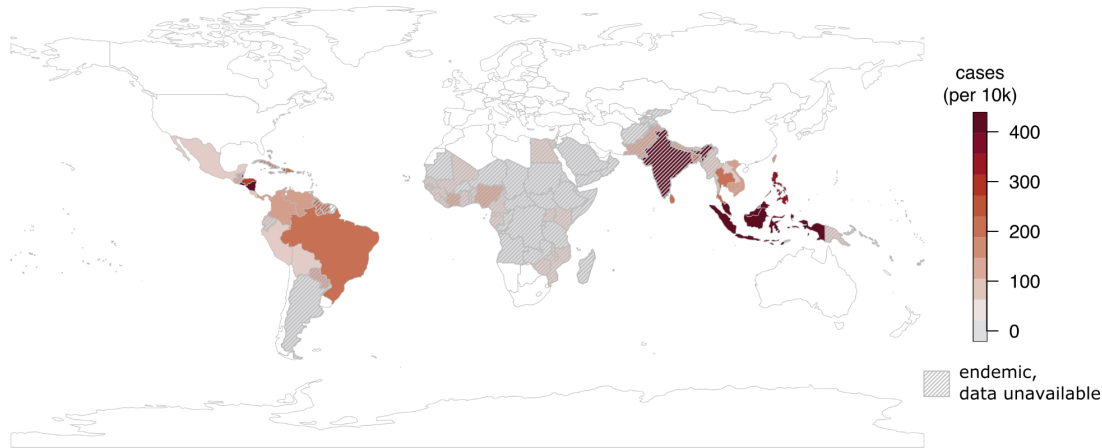

Figure S1: **Availability of dengue data in endemic areas.** Shading indicates no subnational subannual data was available for that country. Dengue cases are annual estimates (Zeng et al. 2021).

Table S3: Projected percent change in dengue incidence for countries under different climate scenarios. Numbers are median estimates followed by 95% CIs.

| country | current vs no anthropogenic forcing | current vs SSP3-7.0  | current vs SSP2-4.5  | current vs SSP1-2.6   | SSP1-2.6 vs SSP3-7.0 |
|---------|-------------------------------------|----------------------|----------------------|-----------------------|----------------------|
| overall | -18.2% (-25.5- -12.1%)              | 57.3% (33.3-107.1%)  | 54.2% (27.6-98.3%)   | 39.9% (16.8-76%)      | 7.3% (0.9-19.6%)     |
| BOL     | -37.6% (-55.2- -24.6%)              | 178.5% (80.9-917.8%) | 151.2% (69.1-754.4%) | 104.7% (41.5-461.5%)  | 29.7% (3.8-80.7%)    |
| PER     | -39.3% (-50.3- -30.3%)              | 187.7% (88.5-389.3%) | 162.8% (75-363.7%)   | 109.6% (48.2-306.1%)  | 27.9% (0.6-64.6%)    |
| MEX     | -31.1% (-40.6- -5.9%)               | 139.7% (84.2-354.5%) | 132.4% (66.9-280.3%) | 93.5% (35.2-232.5%)   | 22.6% (-3.5-56.3%)   |
| COL     | -29.2% (-43.3- -17.4%)              | 131% (58.5-305%)     | 111.4% (48.5-264.6%) | 75.9% (31.1-181.4%)   | 19.5% (2.6-48%)      |
| CRI     | -32.4% (-42.8- -24.3%)              | 108.5% (40-212.3%)   | 95.7% (50.8-189.8%)  | 74.3% (23.8-146.9%)   | 20.6% (1.3-32.9%)    |
| TWN     | -14.6% (-21.6-0.7%)                 | 91.1% (39.1-171%)    | 89% (27.5-162.1%)    | 70.1% (13.9-134.7%)   | 11.4% (-10.1-34.6%)  |
| BRA     | -32.4% (-49- -19%)                  | 91.8% (44.8-138.8%)  | 81.4% (23.7-150.6%)  | 56.8% (27.6-105.9%)   | 15% (4.1-42.6%)      |
| HND     | -30.3% (-41.5- -18.1%)              | 81.7% (40.9-151.8%)  | 68.8% (31.9-129.5%)  | 54% (17-100.6%)       | 16.2% (5.3-27.9%)    |
| SLV     | -34.6% (-53.2- -21.5%)              | 65.3% (30.5-105.6%)  | 56.7% (21.4-94.6%)   | 42.9% (12.8-74.9%)    | 15.5% (5.4-33.7%)    |
| LAO     | -6.7% (-22.6-2.9%)                  | 41.1% (5.1-80.2%)    | 45.1% (9.3-75.9%)    | 40.7% (11.5-95.7%)    | -2.1% (-12.6-21.1%)  |
| NIC     | -23.3% (-34.5- -14.3%)              | 43.7% (25.6-69.2%)   | 39.9% (20.7-62.8%)   | 30.5% (12.2-52%)      | 8.6% (1.9-17.9%)     |
| VEN     | -18.3% (-27.5- -10.3%)              | 37.3% (22.3-60.9%)   | 34.8% (21.6-58.9%)   | 27.8% (12.3-48.9%)    | 4% (-1.2-12%)        |
| VNM     | 0.9% (-9.5-9.3%)                    | 30.3% (1.6-59.9%)    | 40.2% (5.1-71.7%)    | 38.5% (6.1-67.8%)     | -4.1% (-11.9-15%)    |
| DOM     | -15.5% (-23.9- -7.2%)               | 22.9% (12.2-37.6%)   | 22% (12.4-37.9%)     | 18.4% (8-32.3%)       | 2.9% (-1.4-9.1%)     |
| IDN     | -15.2% (-22.3- -9.1%)               | 18.1% (9-30.1%)      | 17.2% (8.7-28.3%)    | 14.7% (7.6-26.1%)     | 2.6% (-0.9-6.6%)     |
| PAN     | -12.1% (-18.5- -7%)                 | 9.9% (0.1-19.9%)     | 9.7% (0.4-18.5%)     | 8.6% (1.9-17.7%)      | 0.6% (-3.4-4.3%)     |
| LKA     | -9% (-18- -4.8%)                    | 8.4% (0.3-18.2%)     | 8% (0.4-17.3%)       | 6.9% (0.9-15.5%)      | -0.2% (-3.3-1%)      |
| PHL     | -7.1% (-12.4- -2.7%)                | 2.8% (-7.3-11.7%)    | 3.2% (-5.6-11.1%)    | 3.2% (-3.9-9.6%)      | -0.9% (-5.8-2.6%)    |
| MYS     | -8.6% (-15.2- -3.1%)                | 0.7% (-11.6-9.4%)    | 1.2% (-9-9.2%)       | 1.9% (-6.4-7.9%)      | -1.4% (-6.2-1.6%)    |
| THA     | -0.2% (-6.3-6.3%)                   | -9.1% (-24.6-0.3%)   | -8.3% (-21.3-1.4%)   | -5.6% (-18.9-2.9%)    | -5.3% (-13.8-5.2%)   |
| KHM     | 1.8% (-3.7-9.9%)                    | -16.8% (-35- -3.4%)  | -16% (-33.9- -6%)    | -12.2% (-28.1- -2.5%) | -6.5% (-15.4-4.5%)   |

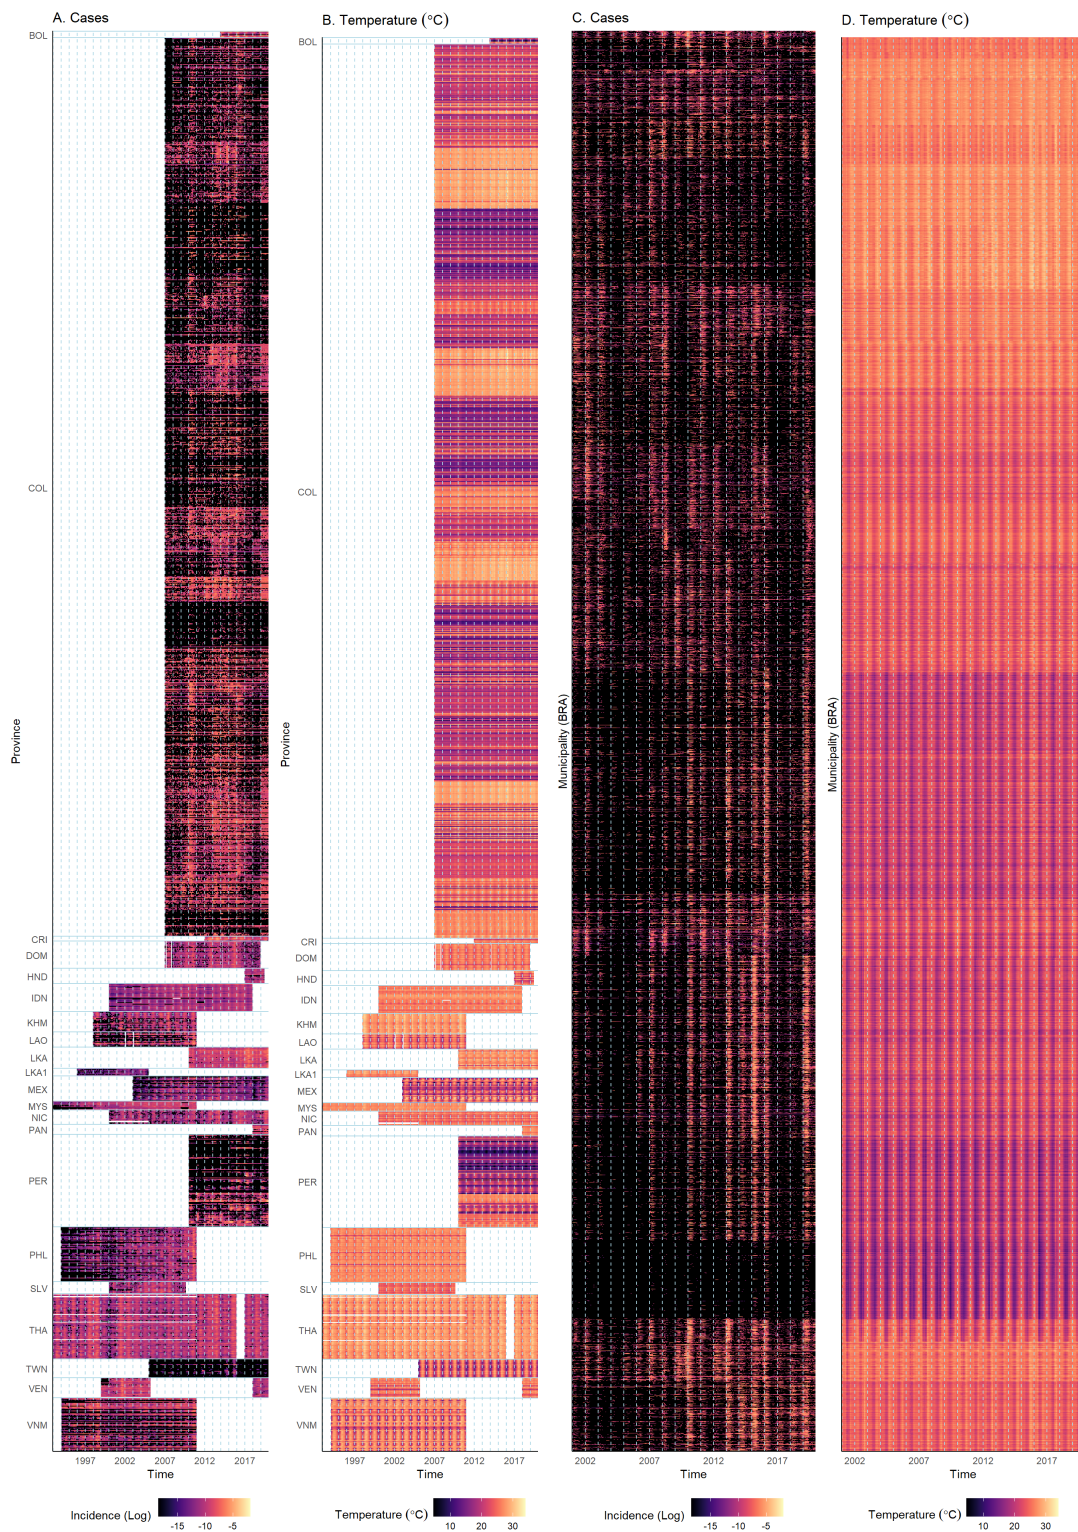

Figure S2: Heatmap of logged monthly dengue incidence and temperature for sub-national administrative units. Months with no data are indicated in white while months with no cases are indicated in black. Countries are indicated on the left by their three-letter codes and horizontal lines separate spatial units in different countries. Vertical dashed lines separate years.

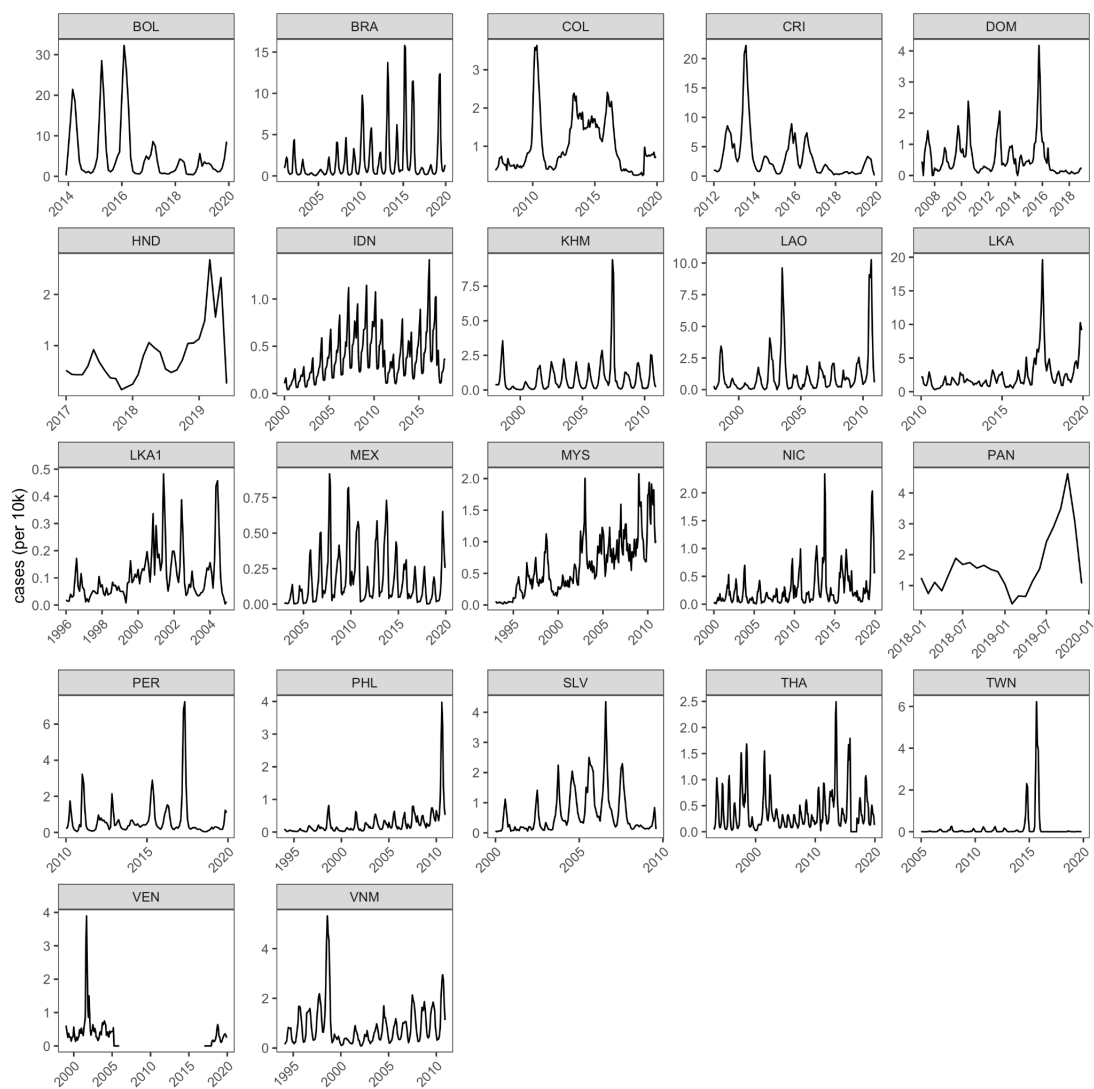

Figure S3: **Epidemic dynamics of dengue in each of 21 countries.** Monthly time series of dengue incidence by country.

**a) comparison of bootstrapped and analytic confidence intervals**

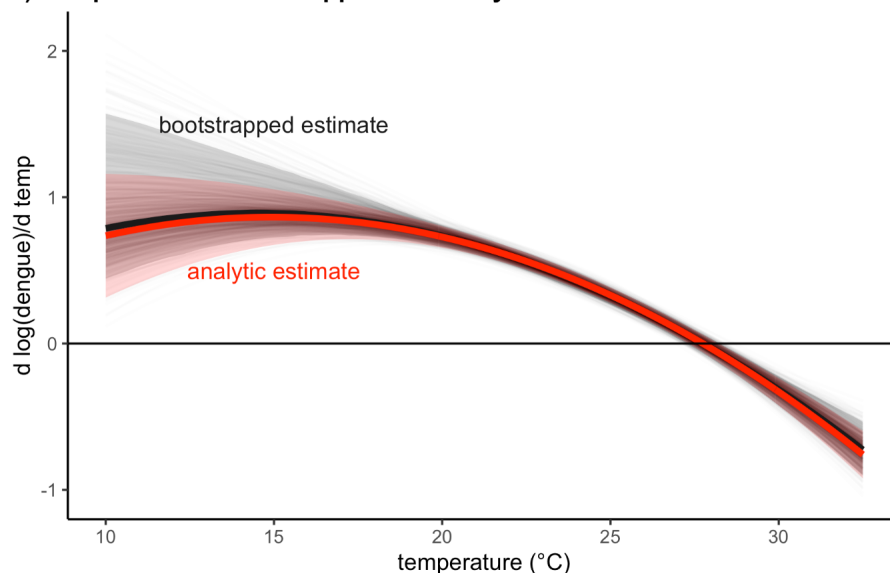

**b) marginal response under different modeling choice**

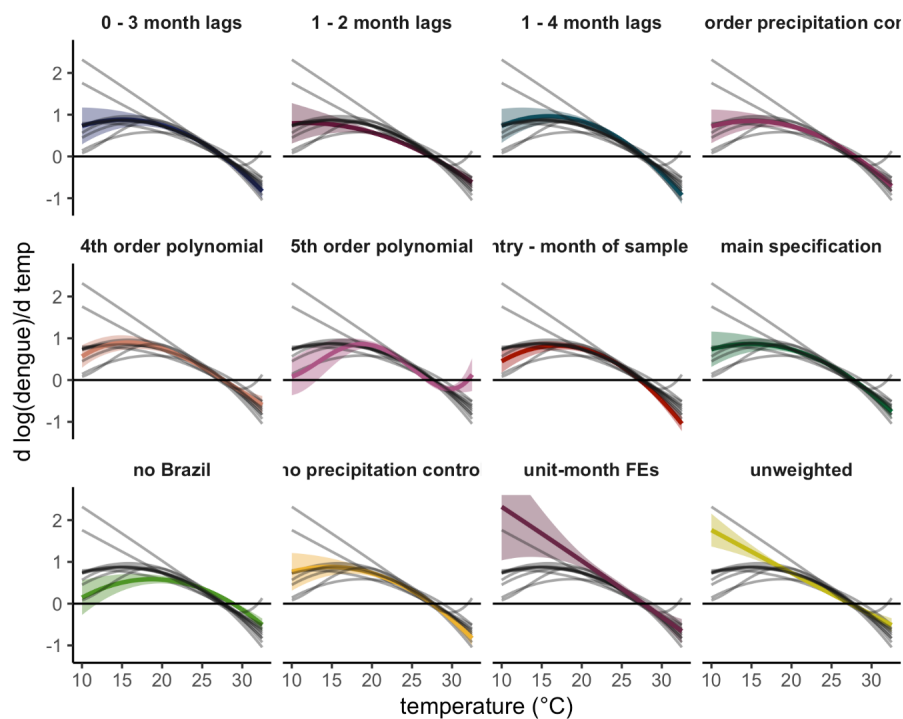

**Figure S4: Sensitivity of results to modelling choices.** (a) Comparison of 95% confidence intervals produced through bootstrapping (gray shaded region) to those produced through an analytic approach (red shaded region). Individual bootstraps are shown in gray lines. (b) The marginal response of dengue to temperature under model variations.

**a) estimated impact of current warming (1995 - 2014)**

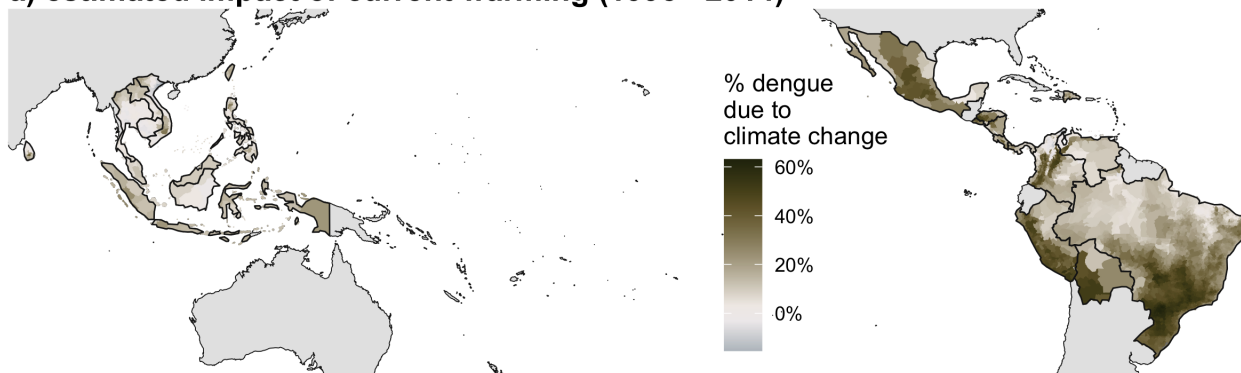

**b) projected changes under future climate scenarios (2040 - 2059)**

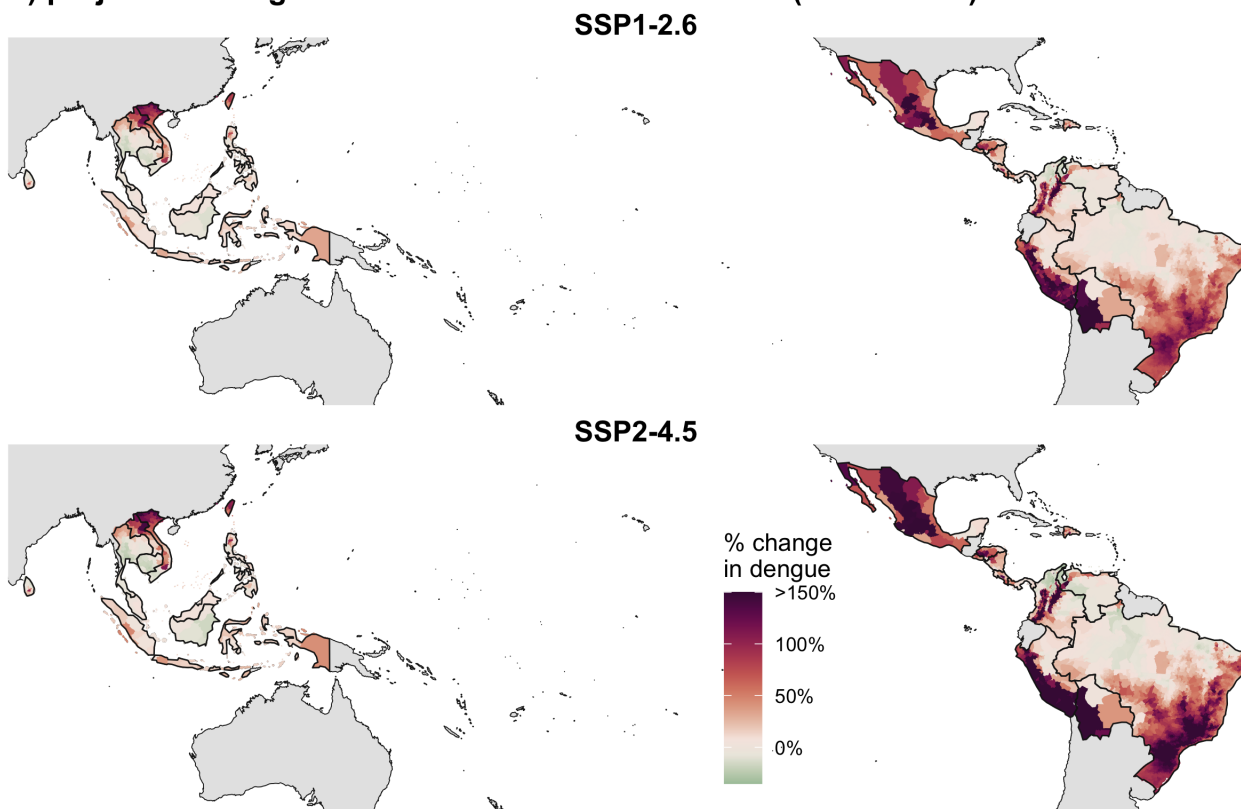

Figure S5: **Maps of impacts of current and future climate warming.** (a) Projected change in dengue under climate scenarios SPP1-2.6 and SPP2-4.5 from 2040-2059. (b) Estimated change in dengue due to current warming (1995-2014) estimated from observed temperatures relative to a model with no anthropogenic forcing.



**a) projected change in dengue incidence under SSP3-7.0 with continent-specific estimates**

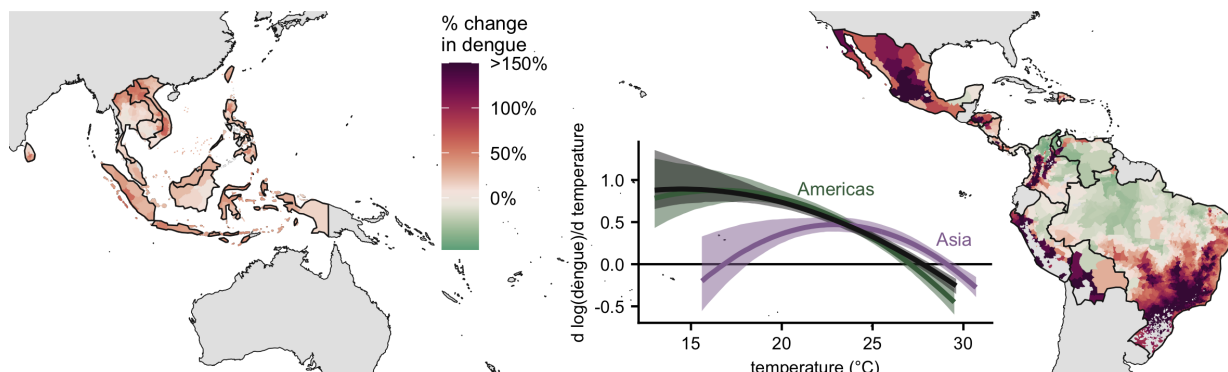

**b) comparison projected changes with main and continent-specific estimates**

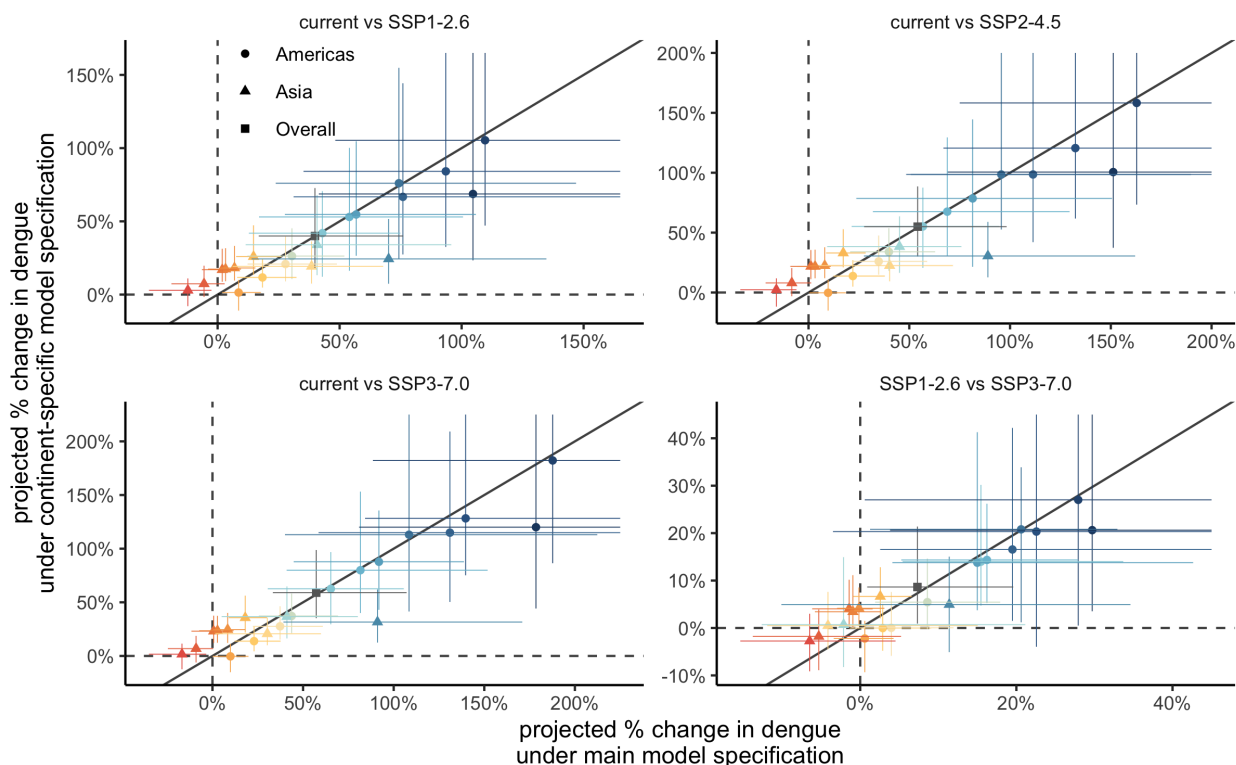

Figure S6: **Projections with continent-specific temperature responses** (a) Projected change in dengue incidence under climate scenario SSP3-7.0 from 2040-2059 based on continent-specific temperature responses. Inset figure shows continent-specific temperature responses for the Americas (green) and Asia (purple) as well as main specification (black) for comparison, (b) Comparison between country average projected changes with the main model (horizontal axis) and continent-specific model (vertical axis) for different future scenarios. Points are median estimates and line segments indicate 95% CIs. Black diagonal line indicates 1-1. Colors match country colors in Fig. 5.

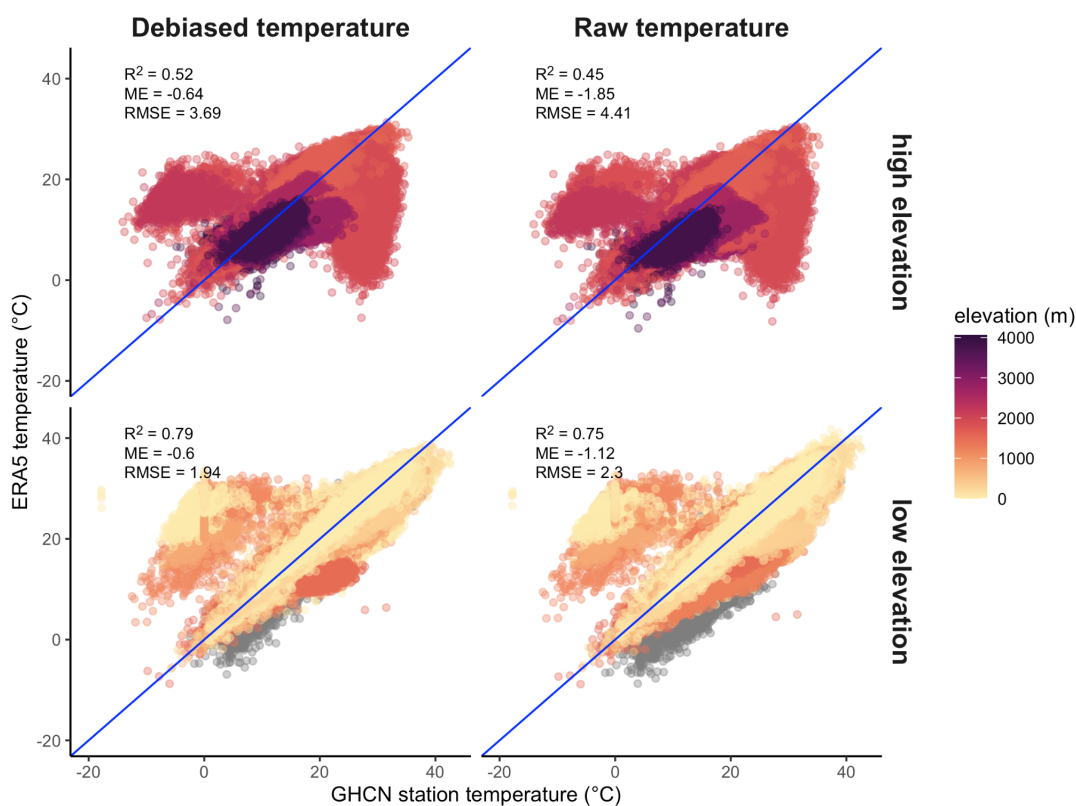

Figure S7: **ERA5 temperature is debiased using WorldClim.** ERA5 temperature is shown against GHCN weather station data. The ERA5 temperature bias, especially prevalent at high elevations, is reduced using monthly WorldClim climatology. Each point is a station-day with points colored by station elevation. High elevation is defined as stations above 1500 meters. Grey points are missing elevation information in the GHCN data set and are included in the low elevation category.  $R^2$  from a linear regression of ERA5 temperature on GHCN station temperature, mean error (ME), and root mean squared error (RMSE) are shown in each panel.
